# Supplementary material for: CaSnO3 nanorod-decorated Bi2WO6 nanosheets as a stable heterojunction photocatalyst for improved photocatalysis and nitrite sensing
Source: Royal Society of Chemistry journal article supplement (doi:10.1039/d4nj01286k), 2024-01-01
Supplement: d4nj01286k1.pdf [file d4nj01286k1.pdf]

## Supporting Information

### **CaSnO<sub>3</sub> nanorods decorated Bi<sub>2</sub>WO<sub>6</sub> nanosheets as a stable heterojunction photocatalyst for improved Photocatalysis and Nitrite sensing**

**Rakesh GN<sup>a</sup>, Udayabhanu<sup>a,b\*</sup>, Priyadarshini HN<sup>a</sup>, Fahd Alharethy<sup>c</sup>, Pavitra V<sup>d</sup>,  
Anusha B R<sup>a</sup>, Appu S<sup>a</sup>, Aarti D P<sup>e</sup>, Srinivas Reddy G<sup>f</sup>, Nagaraju G<sup>d</sup>,  
Prashantha K<sup>a\*</sup>**

<sup>[a]</sup>Centre for Research & Innovations, BGSIT, Adichunchanagiri University, B.G. Nagara, Mandya District, Karnataka 571448, India.

<sup>[b]</sup>Department of Chemistry, BMS Institute of Technology and Management, Yelahanka, Bangalore 560064, Karnataka, India.

<sup>[c]</sup>Department of Chemistry, College of Science, King Saud University, Riyadh-11451, Kingdom of Saudi Arabia.

<sup>[d]</sup>Energy Materials Research Laboratory, Dept. of Chemistry, Siddaganga Institute of Technology, Tumakuru, 572103, India.

<sup>[e]</sup>Department of Chemistry, School of Applied Sciences, REVA University, Bangalore, 560064, India

<sup>[f]</sup>Department of Physics and Chemistry, Mahatma Gandhi Institute of Technology, Hyderabad, Telangana -500075

**Corresponding authors\*:** [udayabhanubc@gmail.com](mailto:udayabhanubc@gmail.com) & [prashantha.k@gmail.com](mailto:prashantha.k@gmail.com)

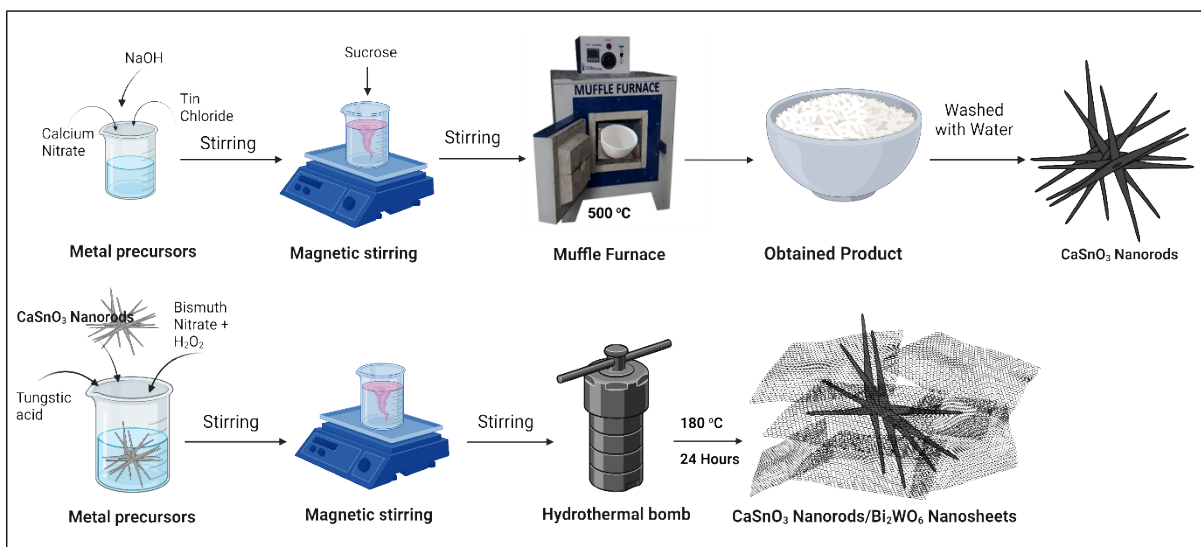

**Fig. S1.** Schematic representation for the synthesis of  $\text{CaSnO}_3$  nanorods/ $\text{Bi}_2\text{WO}_6$  nanosheets composite

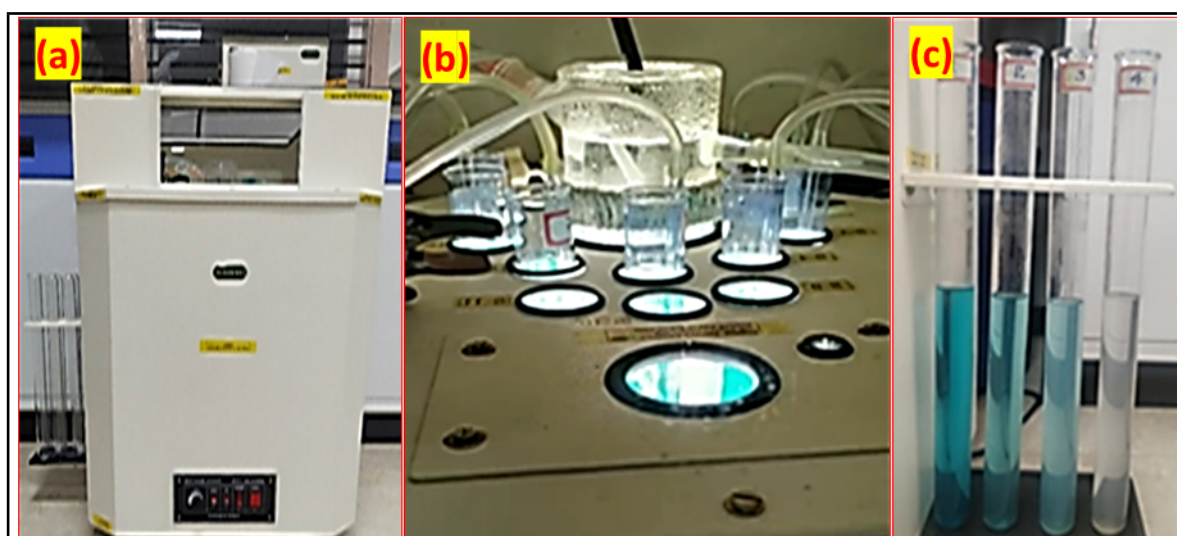

**Fig. S2.** (a) Represents the photocatalytic instrument, (b) Top view of the instrument during the photocatalysis and (c) Tubes contains reaction mixture after successive photodegradation.

### Raman Studies:

**Fig. S3** depicts the Raman plot of  $\text{CaSnO}_3/\text{Bi}_2\text{WO}_6$  compound. The formation of the composite is confirmed by the presence of both  $\text{CaSnO}_3$  and  $\text{Bi}_2\text{WO}_6$  compounds' Raman active modes. The active Raman peaks of orthorhombic  $\text{CaSnO}_3$  phase are represented by 183, 275, 356 and 570  $\text{cm}^{-1}$ . The three major symmetric modes of  $B_{2g}$ ,  $A_g$  and  $B_{1g}$  are defined by 183, 275 and 356  $\text{cm}^{-1}$  peaks. Raman modes centered at 746, 806, 1040, 1120, 1250 and 1300  $\text{cm}^{-1}$  confirmed the presence of  $\text{Bi}_2\text{WO}_6$  antisymmetric and symmetric  $A_g$  modes of O-W-O terminals of

stretching vibrations. The Raman mode located at  $950\text{ cm}^{-1}$  is attributed to the W=O stretching bond.

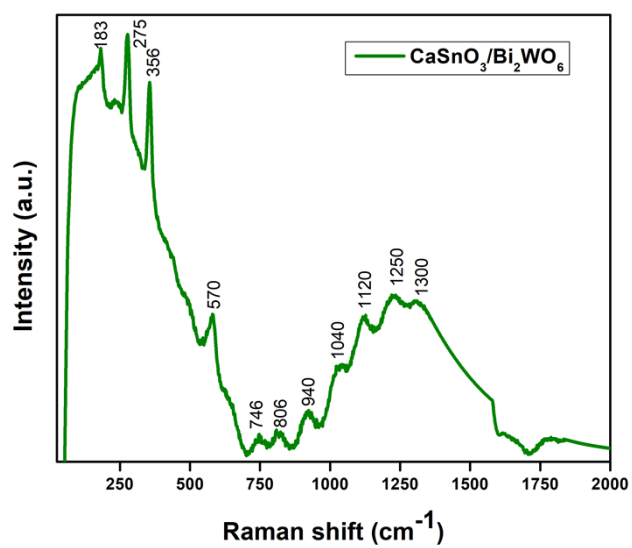

**Fig. S3** Raman spectrum of  $\text{CaSnO}_3/\text{Bi}_2\text{WO}_6$  compound

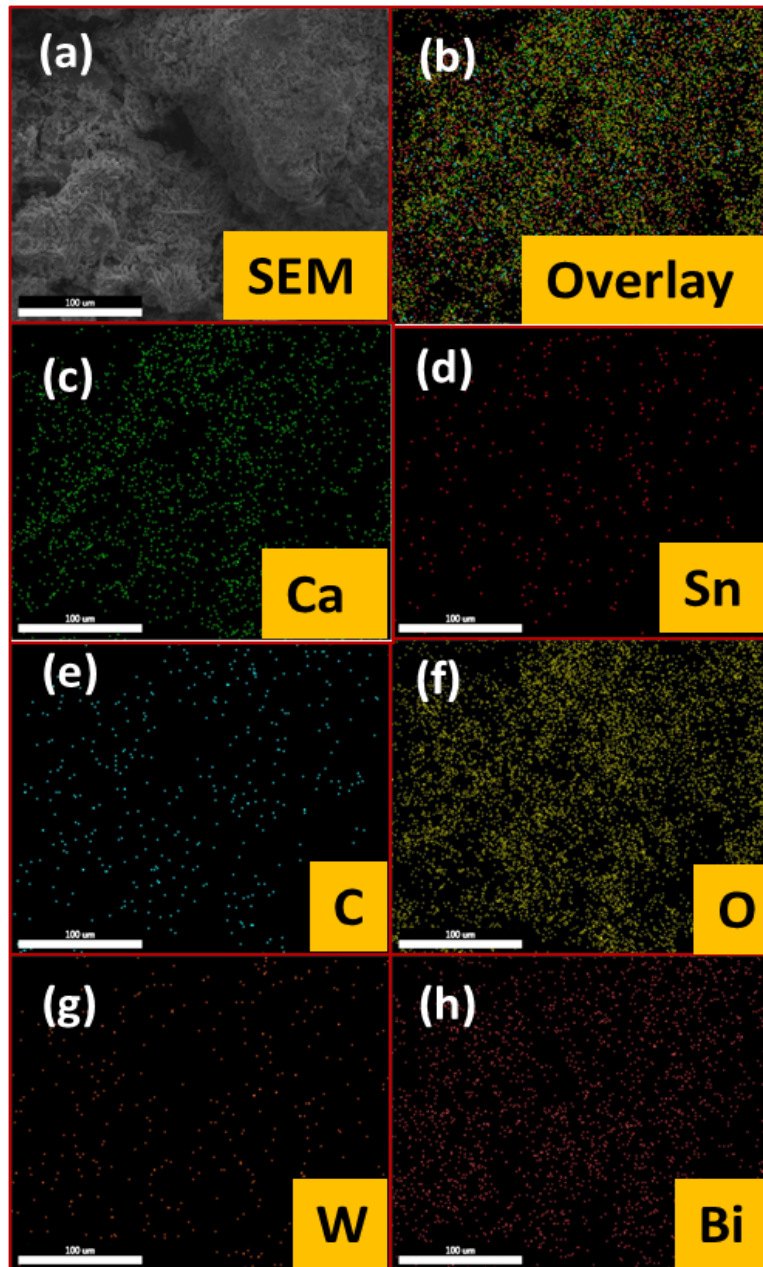

**Fig. S4.** Elemental mapping of  $\text{CaSnO}_3/\text{Bi}_2\text{WO}_6$  composite material shows (a) SEM image, (b) Overlay image, (c) Calcium, (d) Tin, (e) Carbon, (f) Oxygen (g) Tungsten and (h) Bismuth

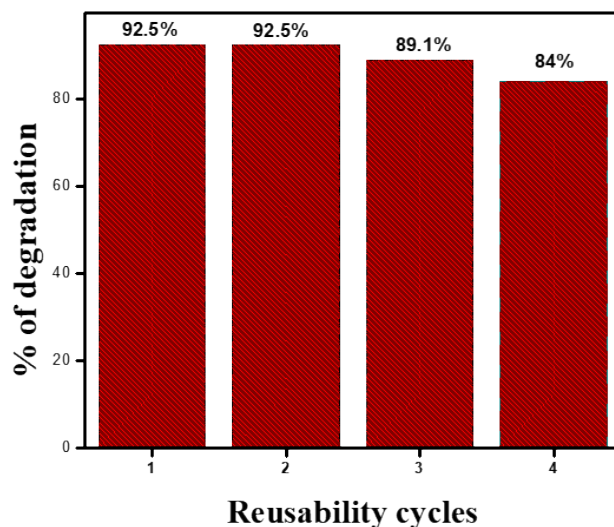

**Fig. S5.** Reusable ability graph of  $\text{CaSnO}_3/\text{Bi}_2\text{WO}_6$  nanocomposite

#### Effect of Scavengers on photocatalytic dye degradation:

To assess the primary contribution of photogenerated species to dye degradation and to forecast a potential photocatalytic mechanism. We have taken three different scavengers, namely, benzoquinone BQ (1mM), ammonium oxalate AO (1mM) and tert-butyl alcohol TBA (1mM), to trap the superoxide ion radical ( $\cdot\text{O}_2^-$ ), hole ( $\text{h}^+$ ) and photogenerated hydroxyl radical ( $\cdot\text{OH}$ ), respectively. The breakdown efficiency of the dye is significantly decreased in **Fig. S6.**, by adding several scavengers. According to analysis, scavengers like BQ, AO, and TBA have MB degradation efficiencies of 70, 64, and 23%, respectively. This illustrates how  $\text{h}^+$  and  $\cdot\text{O}_2^-$  affect the dye degradation when exposed to visible light. However, the addition of TBA scavenges the activity of  $\cdot\text{OH}$ , leading to a significant reduction in the photocatalytic activity, suggesting that  $\cdot\text{OH}$  and are the primary dynamic species in dye photodegradation.

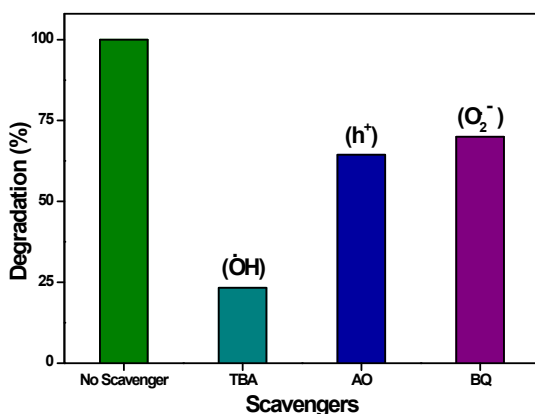

**Fig. S6** Photocatalytic degradation for the kinetic studies of  $\text{CaSnO}_3/\text{Bi}_2\text{WO}_6$  composite

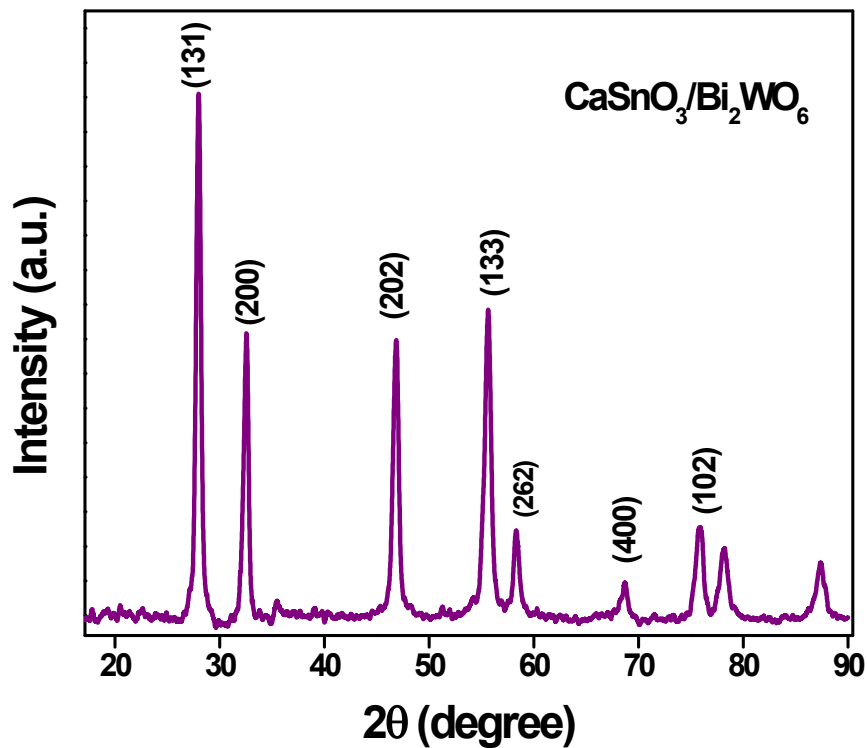

Fig. S7. XRD Pattern of  $\text{CaSnO}_3/\text{Bi}_2\text{WO}_6$  nanocomposites after the degradation.

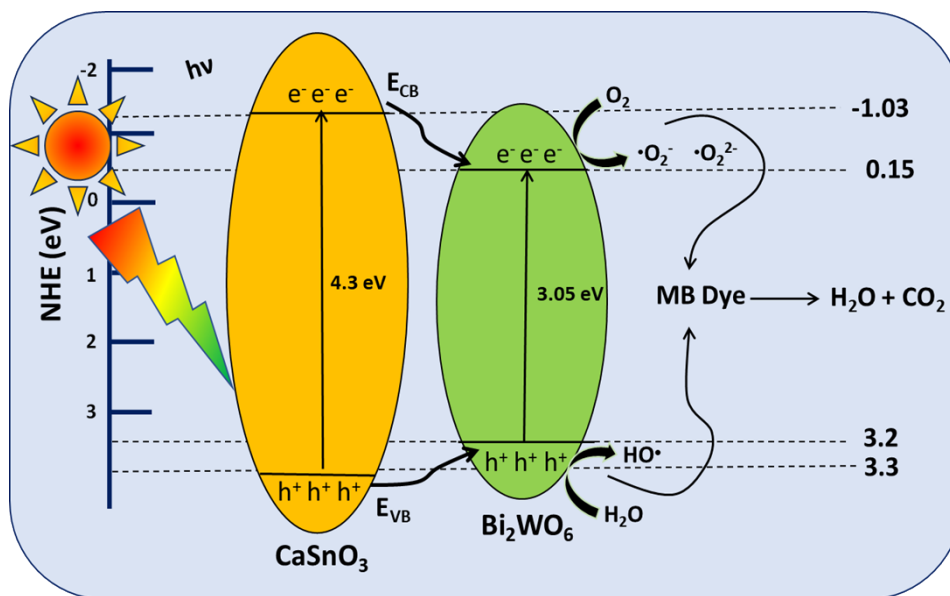

Fig. S8. Schematic representation of Type-I schemes for the photocatalytic MB degradation

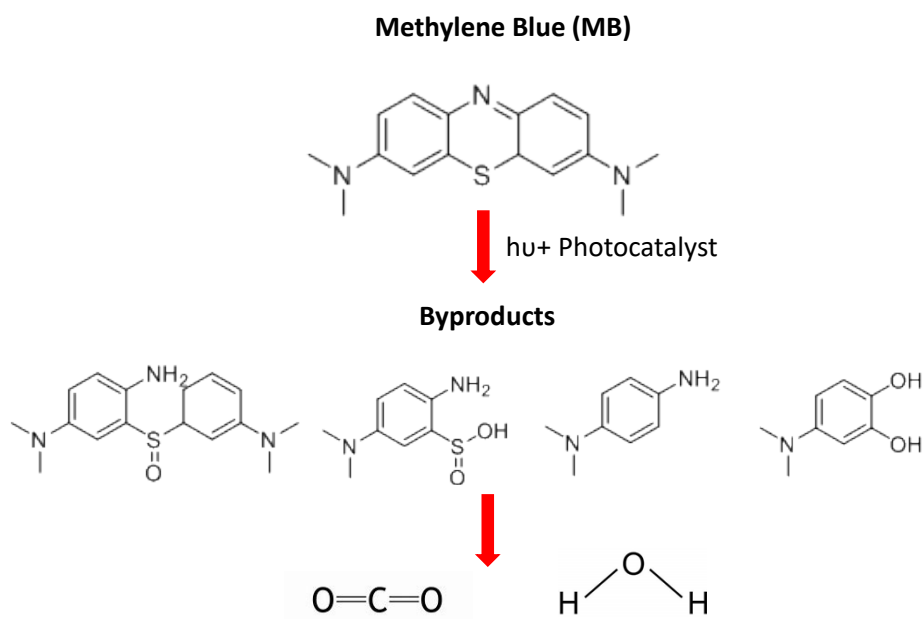

**Fig. S9** Trajectory of photocatalytic degradation of Methylene blue

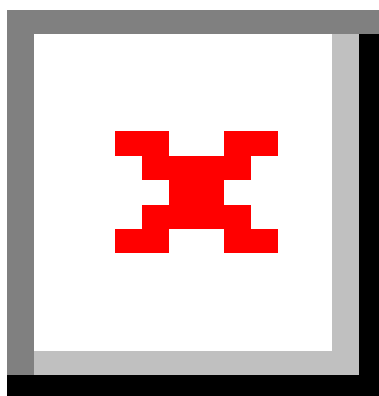

**Fig. S9a.** List of degradation intermediate structures with molecular weights

MS Spectrum

Line# 1 RTime:---(Scan#:---)

MassPeaks:169

Spectrum Mode:Averaged 0.670-0.763(403-459) Base Peak:306(2762)

BG Mode:Averaged 0.000-0.663(1-399) Segment 1 - Event 1

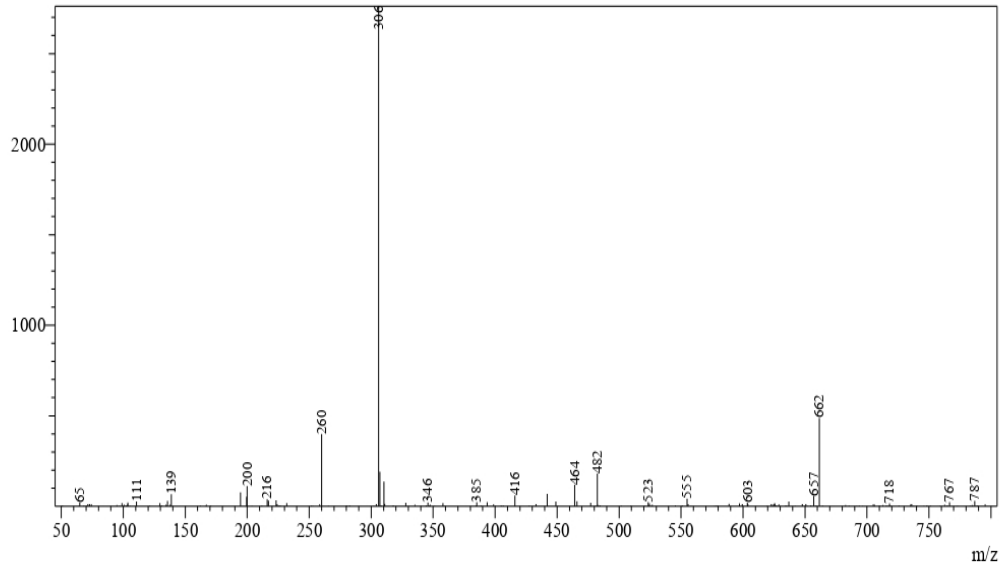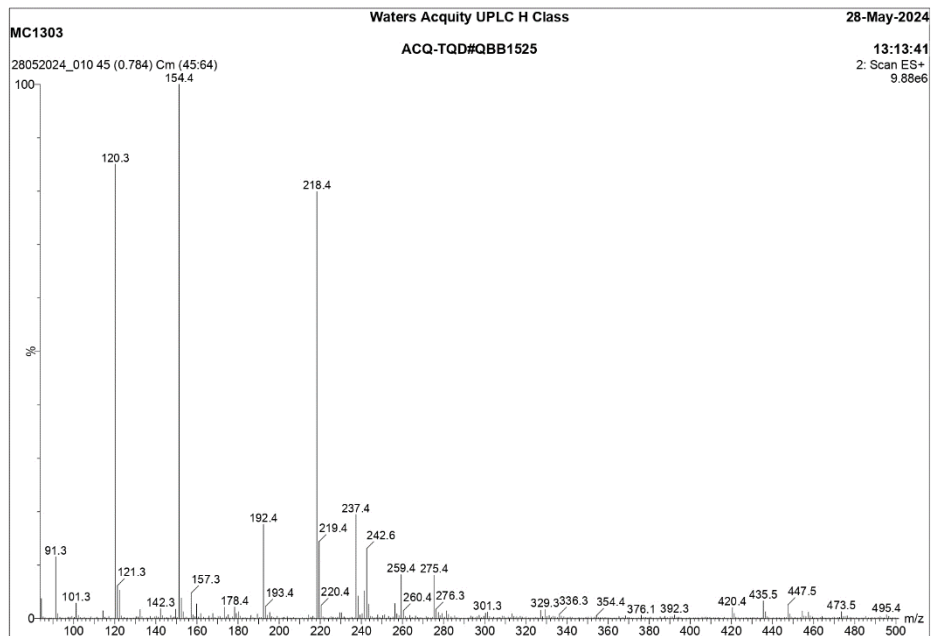



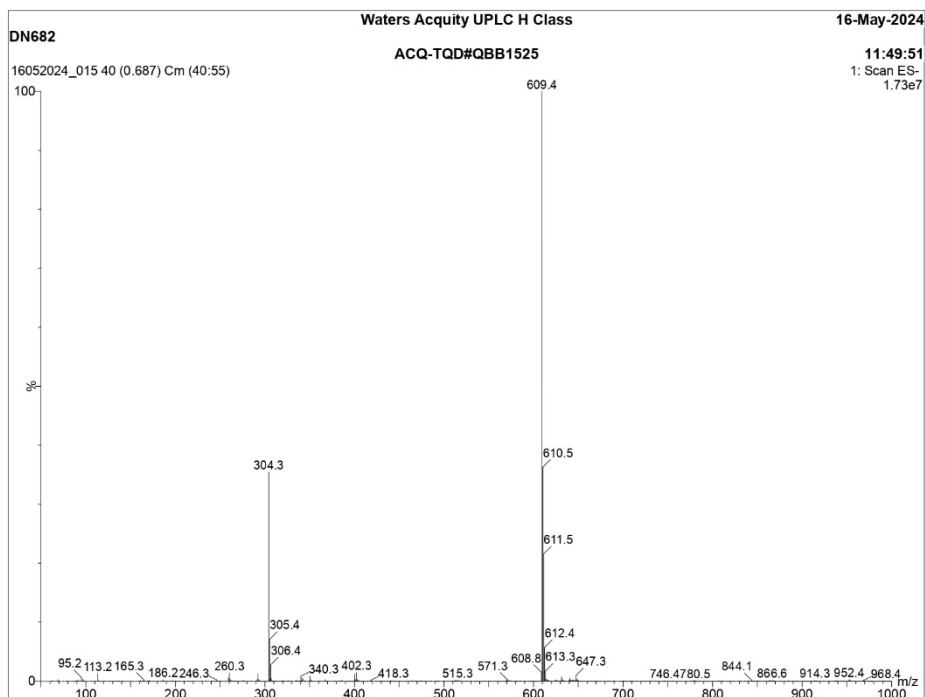

Fig. S9b. Mass spectrum of Methylene blue dye degradation intermediate products

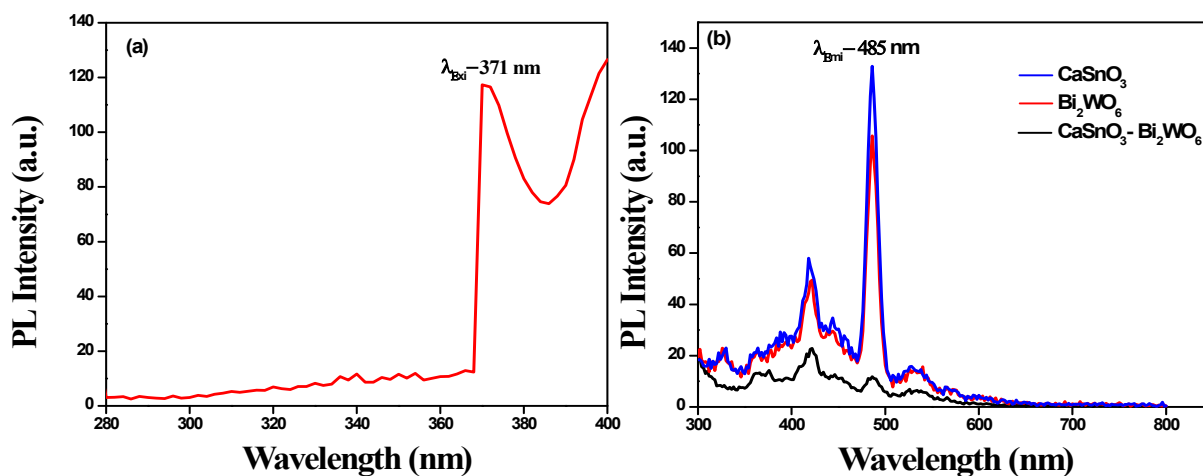

Fig. S10. Photoluminescence spectra of (a) Excitation spectrum, (b) Emission plots of CaSnO<sub>3</sub>, Bi<sub>2</sub>WO<sub>6</sub>, CaSnO<sub>3</sub>/Bi<sub>2</sub>WO<sub>6</sub>

### Effect of CV with different pH:

The cyclic voltammogram of the modified GCE compound with  $\text{CaSnO}_3/\text{Bi}_2\text{WO}_6$  at various pH values is shown in **Fig. S11**. The oxidation peak current response is observed within  $50 \mu\text{A}$  in the electrocatalytic activity of the elementary weak alkali (pH 9) and strong acidic (pH 4). The oxidation current response for the slightly acidic pH 6 increased to  $80 \mu\text{A}$ ; for the neutral pH 7, it reached a higher value of  $165 \mu\text{A}$ . This reveals that pH variation does not impact sensing for the  $\text{CaSnO}_3/\text{Bi}_2\text{WO}_6$  modified GCE.

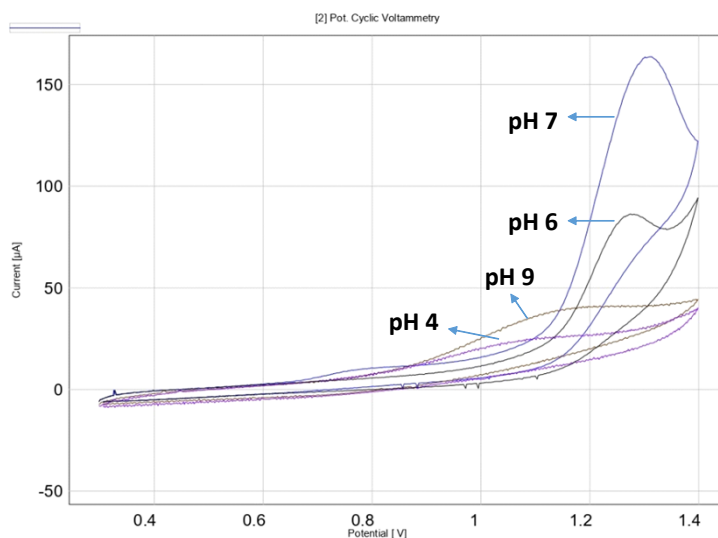

**Fig. S11** Cyclic voltammogram of  $\text{CaSnO}_3/\text{Bi}_2\text{WO}_6$  compound at different pH values

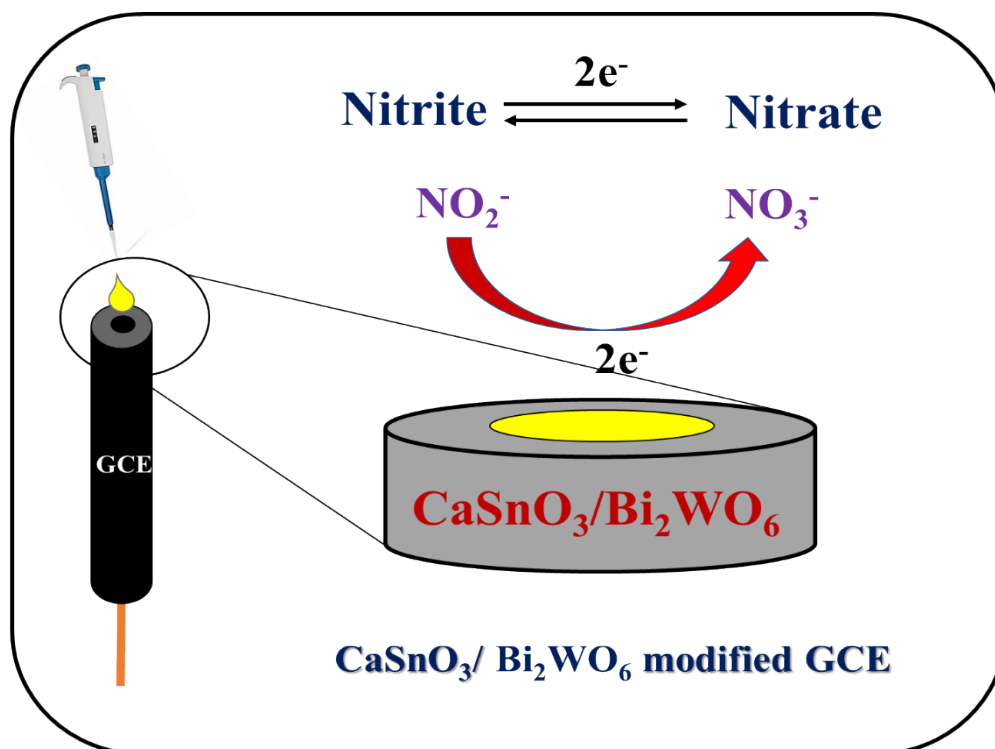

**Fig. S12.** Schematic representation showing the mechanism of electrochemical nitrite sensing by  $\text{CaSnO}_3/\text{Bi}_2\text{WO}_6$  modified glassy carbon electrode
